# Supplementary material
Source: publisher site journal article supplement (https://www.dovepress.com/article/230237)
Supplement: Supplementary file 1 [file get_supplementary_file.php]

Supporting information

A pH-responsive charge-reversal drug delivery system with tumor-specific drug release and ROS generation for cancer therapy


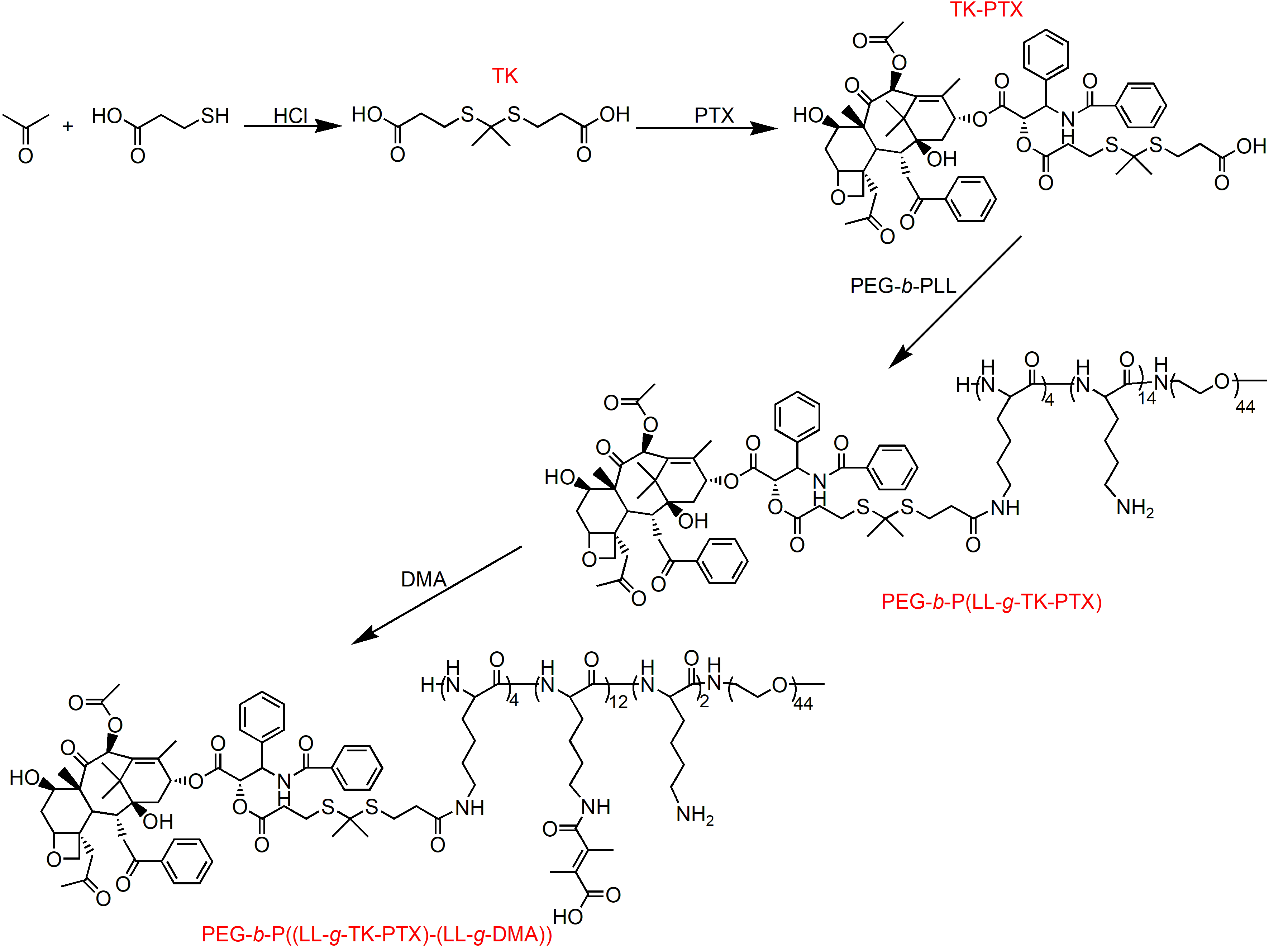


**Scheme S1.** Synthesis route of PEG-*b*-P((LL-*g*-TK-PTX)-(LL-*g*-DMA)).


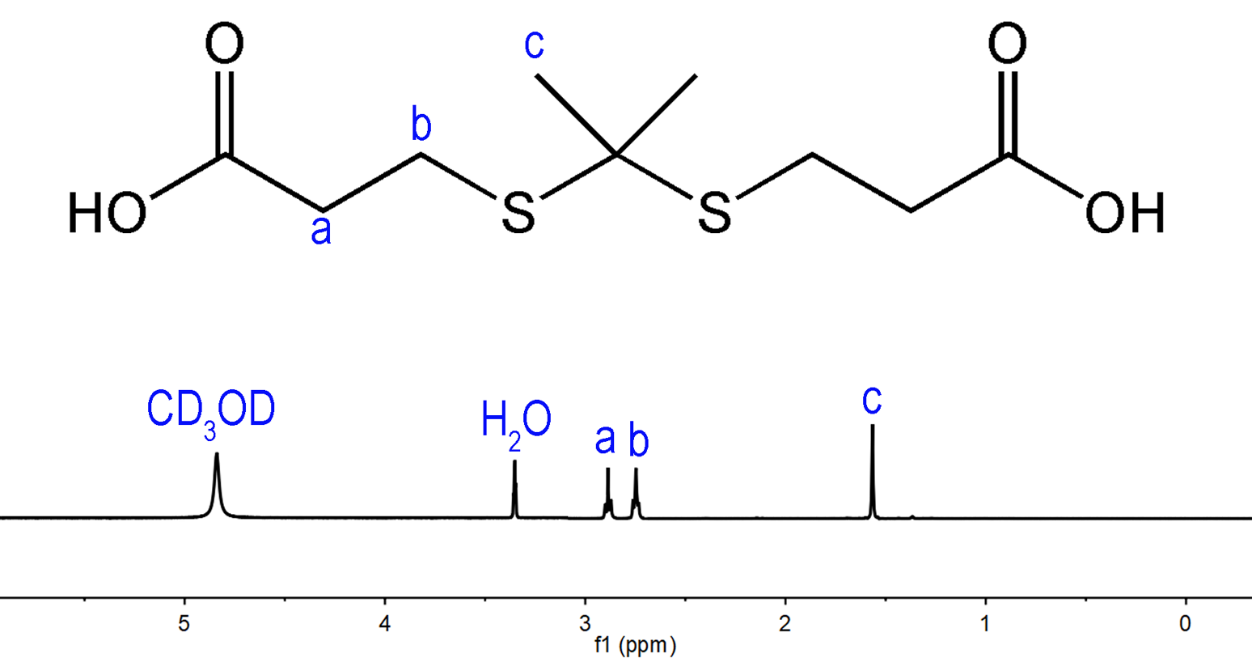


**Fig. S1** 1H NMR spectrum of TK in CDOD3.


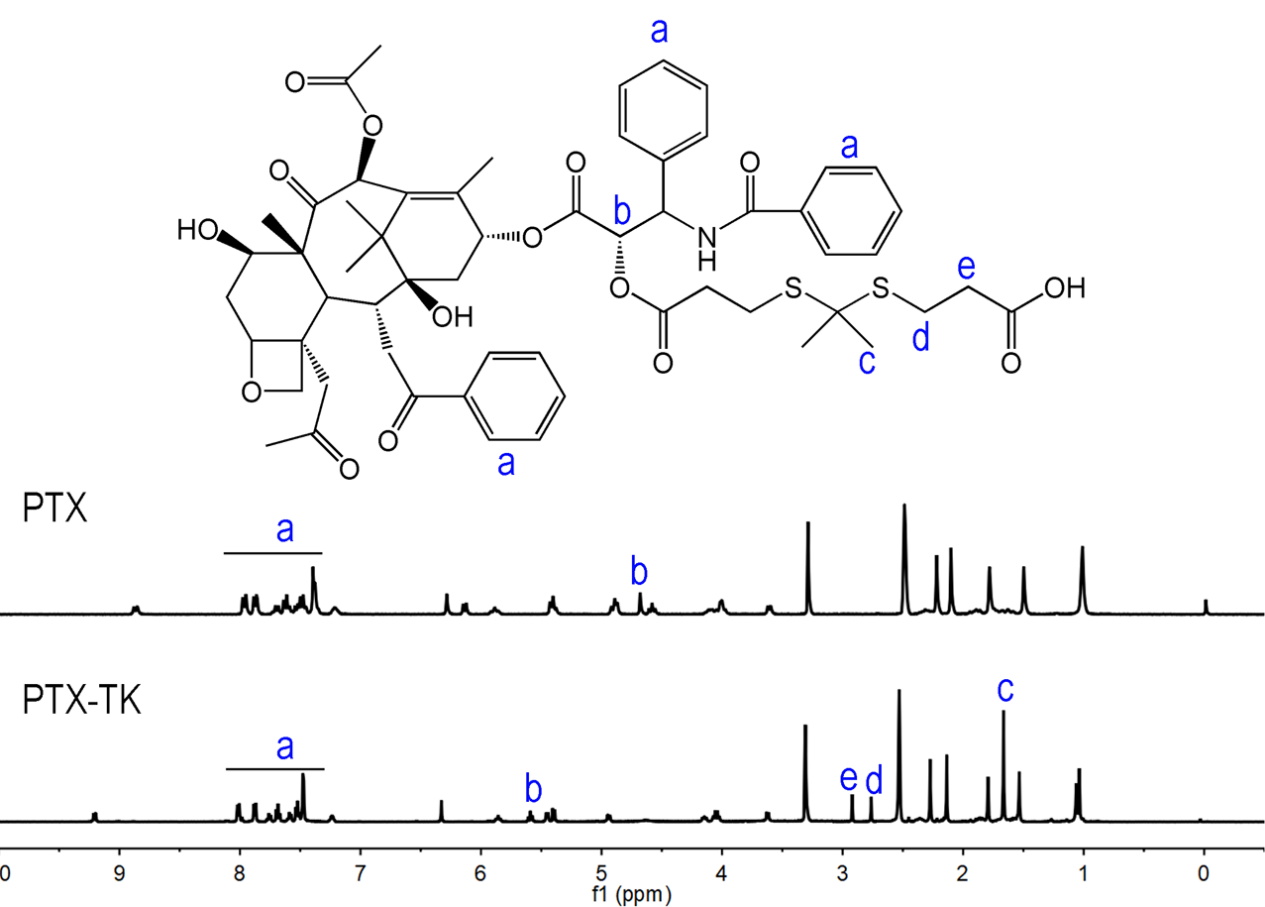


**Fig. S2** 1H NMR spectrum of TK in DMSO*d6*.


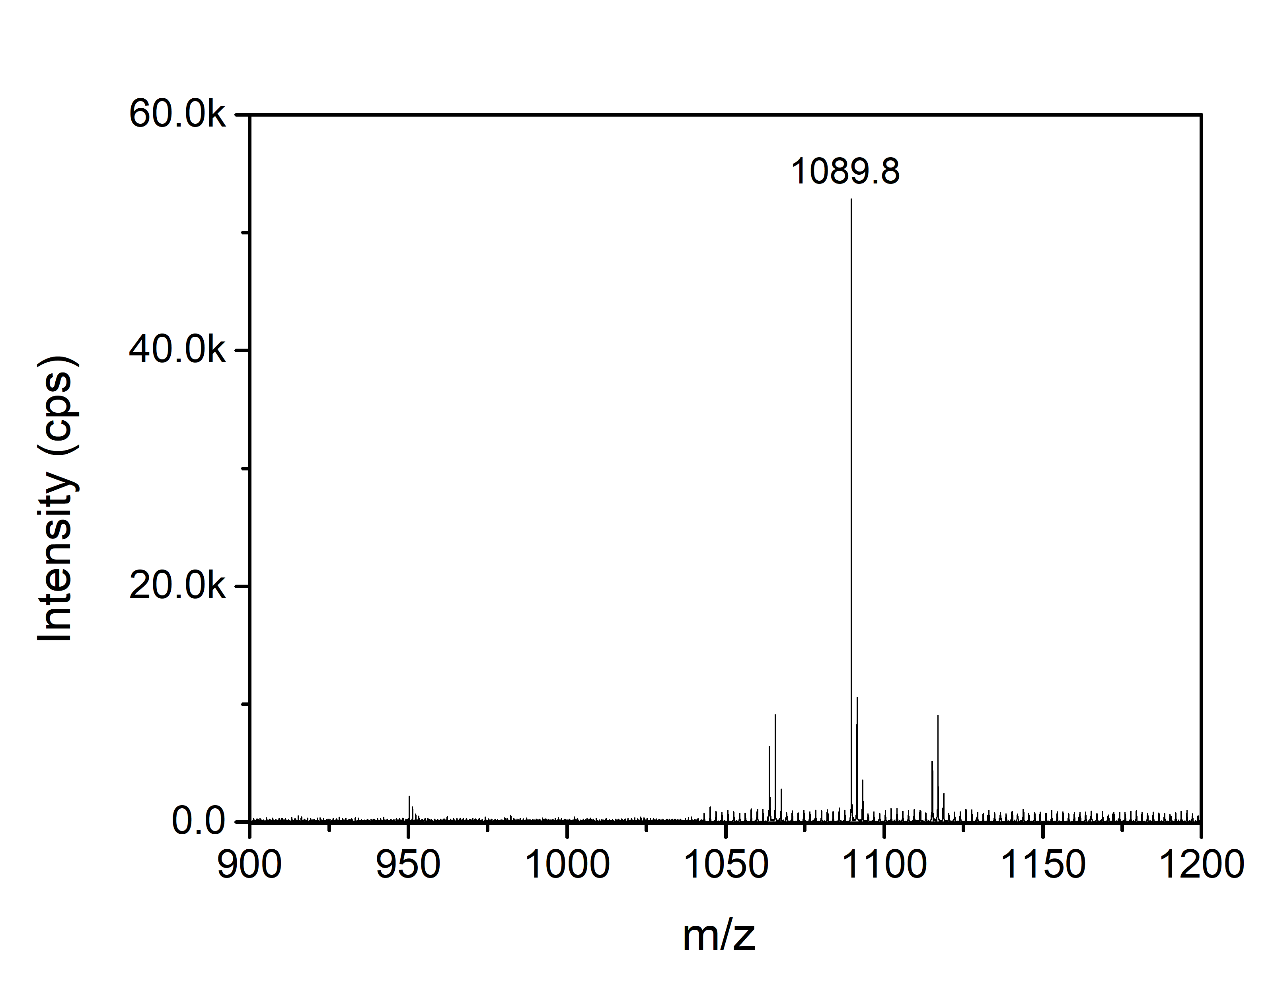


**Fig. S3** Liner ion trap mass spectrum of TK-PTX record in a





**Fig. S4** Hemolysis rate of PVD-NPs, PD-NPs, and PVS-NPs.





**Fig. S5** Mean fluorescence intensity (MFI) analyzed by flow cytometry of DCF signal in NIH-3T3 cells after treated with PD-NPs, VK3, PVD-NPs, and PVD-NPs + DIC.





Fig. S6 Cytotoxicity of PTX, VK3, PTX+VK3, PVD-NPs, and PD-NPs against NIH-3T3 cells. Data showed as mean ± SD, n = 6.


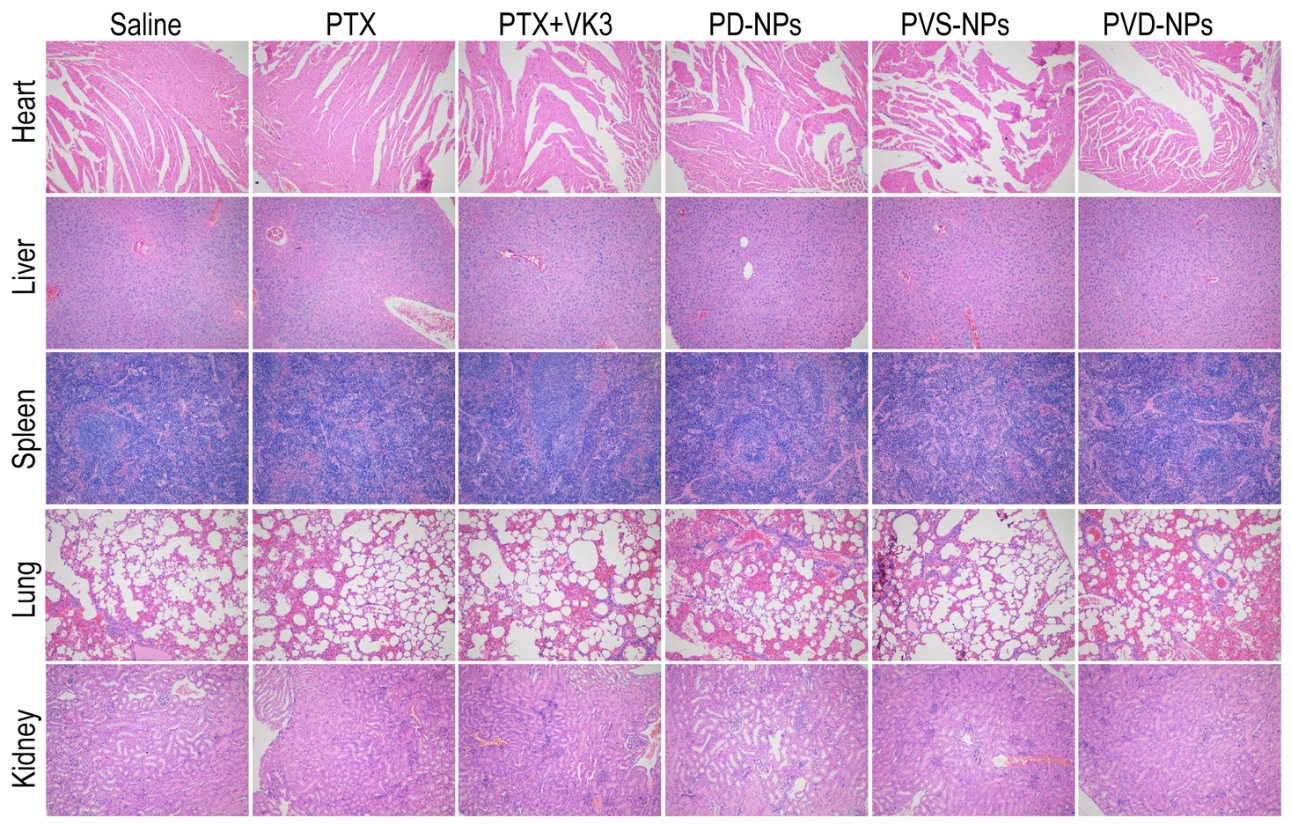


**Fig. S7** Images of H&E staining of major organs sections, the images were acquired at 20× objective.
